# Supplementary material
Source: publisher site journal article supplement (https://www.spandidos-publications.com/8289/downloadSupplementary)

Figure S1. Clinical timeline summary. Timeline of symptom onset, neurosurgical biopsy, pathology interpretation, initiation of high-dose corticosteroid therapy and follow-up outcomes in the present case of spinal cord-limited primary central nervous system vasculitis. IV, intravenous; mRS, modified Rankin scale.

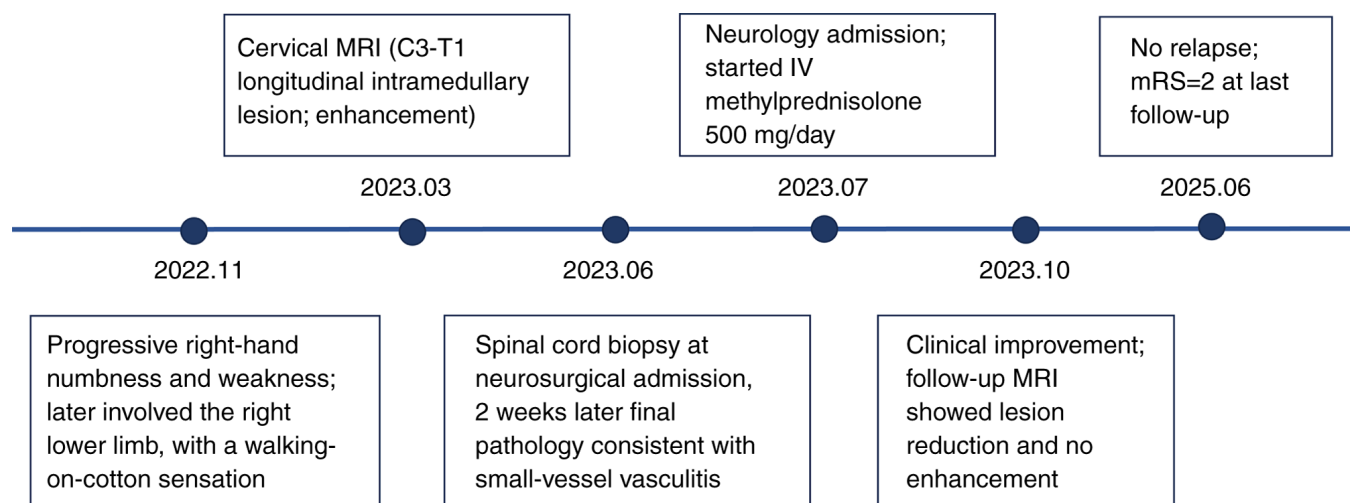

Supplement: Supplementary file 1 [file downloadSupplementary]
